# Supplementary material for: Microtubules as a versatile reference standard for expansion microscopy
Source: Springer Nature journal article supplement (doi:10.1038/s42003-025-07967-3), 2025-03-26
Supplement: MOESM3 [file 42003_2025_7967_MOESM3_ESM.pdf › 42003_2025_7967_MOESM3_ESM.pdf]

## **Description of Additional Supplementary Files**

**File name:** Supplementary Data

**Description:** The source data behind the graphs in the paper.
