# Supplementary material for: Microtubules as a versatile reference standard for expansion microscopy
Source: Commun Biol. 2025 Mar 26;8:499. doi: 10.1038/s42003-025-07967-3 (PMC11947214; doi:10.1038/s42003-025-07967-3)
Supplement: Supplementary file 4 — Supplementary data [file 42003_2025_7967_MOESM4_ESM.xlsx]

## Sheet: Figure 1
Panel a											Panel c
Normalized				Raw data
Distance	STED	Confocal			Confocal			STED			Distance_(pixels)	Gray_Value
0	0.142617	0.30315		Distance_(microns)	Gray_Value		Distance_(microns)	Gray_Value			0	9.58
0.02662	0.091743	0.221939		0	861.633		0	3.5695			1	20.75
0.05324	0.131282	0.258623		0.02662	630.811		0.02662	2.2962			2	17.708
0.07986	0.208035	0.319858		0.05324	735.075		0.05324	3.2858			3	6.035
0.10648	0.165523	0.326938		0.07986	909.121		0.07986	5.2068			4	4.928
0.1331	0.248888	0.257291		0.10648	929.246		0.10648	4.1428			5	4.293
0.15972	0.306227	0.463059		0.1331	731.291		0.1331	6.2293			6	4.408
0.18634	0.203416	0.530968		0.15972	1316.14		0.15972	7.6644			7	6.003
0.21296	0.355291	0.518261		0.18634	1509.15		0.18634	5.0912			8	6.639
0.23958	0.455053	0.796684		0.21296	1473.04		0.21296	8.8924			9	8.728
0.2662	0.647058	0.674311		0.23958	2264.39		0.23958	11.3893			10	8.157
0.29282	0.759139	0.781464		0.2662	1916.57		0.2662	16.1949			11	7.752
0.31944	0.829586	0.761967		0.29282	2221.13		0.29282	19.0001			12	7.852
0.34606	0.667639	0.773441		0.31944	2165.71		0.31944	20.7633			13	11.328
0.37268	0.792572	0.746347		0.34606	2198.33		0.34606	16.71			14	12.186
0.3993	0.410033	0.766752		0.37268	2121.32		0.37268	19.8369			15	10.923
0.42592	0.448864	0.87989		0.3993	2179.31		0.3993	10.2625			16	10.909
0.45254	0.409649	0.808775		0.42592	2500.88		0.42592	11.2344			17	10.766
0.47916	0.5477	0.775467		0.45254	2298.75		0.45254	10.2529			18	11.828
0.50578	0.663292	1		0.47916	2204.08		0.47916	13.7081			19	12.894
0.5324	0.73716	0.962103		0.50578	2842.27		0.50578	16.6012			20	14.321
0.55902	0.733919	0.964397		0.5324	2734.55		0.5324	18.45			21	17.866
0.58564	0.821779	0.988362		0.55902	2741.08		0.55902	18.3689			22	21.507
0.61226	0.781122	0.993306		0.58564	2809.19		0.58564	20.5679			23	26.428
0.63888	0.793583	0.920934		0.61226	2823.24		0.61226	19.5503			24	28.483
0.6655	0.825739	0.781446		0.63888	2617.54		0.63888	19.8622			25	27.919
0.69212	0.722884	0.716457		0.6655	2221.08		0.6655	20.667			26	24.054
0.71874	0.743053	0.75029		0.69212	2036.36		0.69212	18.0927			27	21.362
0.74536	0.6109	0.693328		0.71874	2132.53		0.71874	18.5975			28	21.022
0.77198	0.511541	0.646183		0.74536	1970.62		0.74536	15.2899			29	24.121
0.7986	0.435639	0.589446		0.77198	1836.62		0.77198	12.8031			30	31.622
0.82522	0.270576	0.516469		0.7986	1675.36		0.7986	10.9034			31	42.724
0.85184	0.256787	0.483968		0.82522	1467.94		0.82522	6.7721			32	49.423
0.87846	0.318633	0.564555		0.85184	1375.57		0.85184	6.427			33	62.978
0.90508	0.267303	0.551583		0.87846	1604.62		0.87846	7.9749			34	82.911
0.9317	0.409178	0.743725		0.90508	1567.75		0.90508	6.6902			35	93.884
0.95832	0.562339	0.803513		0.9317	2113.87		0.9317	10.2411			36	79.54
0.98494	0.483429	0.7848		0.95832	2283.8		0.95832	14.0745			37	56.281
1.01156	0.49868	0.786033		0.98494	2230.61		0.98494	12.0995			38	48.787
1.03818	0.911397	0.814456		1.01156	2234.12		1.01156	12.4812			39	52.532
1.0648	1	0.801633		1.03818	2314.9		1.03818	22.8109			40	52.742
1.09142	0.814691	0.908213		1.0648	2278.46		1.0648	25.0285			41	50.282
1.11804	0.862553	0.886808		1.09142	2581.38		1.09142	20.3905			42	60.077
1.14466	0.760078	0.788356		1.11804	2520.55		1.11804	21.5884			43	68.356
1.17128	0.581373	0.820293		1.14466	2240.72		1.14466	19.0236			44	69.073
1.1979	0.586344	0.789593		1.17128	2331.49		1.17128	14.5509			45	53.761
1.22452	0.566067	0.886138		1.1979	2244.23		1.1979	14.6753			46	53.668
1.25115	0.884176	0.767709		1.22452	2518.64		1.22452	14.1678			47	56.741
1.27777	0.770689	0.822646		1.25115	2182.03		1.25115	22.1296			48	53.564
1.30439	0.710962	0.792611		1.27777	2338.18		1.27777	19.2892			49	50.501
1.33101	0.76836	0.774975		1.30439	2252.81		1.30439	17.7943			50	45.322
1.35763	0.770422	0.80364		1.33101	2202.69		1.33101	19.2309			51	42.242
1.38425	0.562427	0.79761		1.35763	2284.16		1.35763	19.2825			52	40.706
1.41087	0.608119	0.778859		1.38425	2267.02		1.38425	14.0767			53	35.24
1.43749	0.596688	0.855888		1.41087	2213.73		1.41087	15.2203			54	33.056
1.46411	0.821887	0.763859		1.43749	2432.66		1.43749	14.9342			55	37.362
1.49073	0.813309	0.683031		1.46411	2171.09		1.46411	20.5706			56	37.36
1.51735	0.81776	0.626153		1.49073	1941.36		1.49073	20.3559			57	35.483
1.54397	0.59326	0.545766		1.51735	1779.69		1.51735	20.4673			58	33.004
1.57059	0.374337	0.452944		1.54397	1551.21		1.54397	14.8484			59	31.603
1.59721	0.304549	0.385736		1.57059	1287.39		1.57059	9.3691			60	32.074
1.62383	0.233242	0.344941		1.59721	1096.37		1.59721	7.6224			61	38.719
1.65045	0.240202	0.191488		1.62383	980.416		1.62383	5.8377			62	45.896
1.67707	0.251873	0.17691		1.65045	544.259		1.65045	6.0119			63	52.935
1.70369	0.203408	0.277724		1.67707	502.826		1.67707	6.304			64	64.328
1.73031	0.239699	0.244175		1.70369	789.366		1.70369	5.091			65	72.081
				1.73031	694.011		1.73031	5.9993			66	88.112
											67	135.351
											68	211.39
											69	203
											70	164.005
											71	123.66
											72	118.395
											73	123.114
											74	88.48
											75	58.077
											76	43.952
											77	42.127
											78	48.038
											79	54.131
											80	50.073
											81	29.671
											82	26.888
											83	34.14
											84	37.363
											85	30.847
											86	30.744
											87	40.742
											88	40.045
											89	24.987
											90	13.955
											91	11.364
											92	11.948
											93	16.245
											94	23.707
											95	28.112
											96	26.98
											97	19.677
											98	13.639
											99	9.538
											100	5.865
											101	4.009
											102	5.253
											103	6.903

## Sheet: Figure 2
Panel d				Panel e
0	0.042943	-0.00507		AB+AB	AB+NB
0.00076	0.033529	-0.00518		45.08	31.36
0.00152	0.03125	-0.00526		61.74	24.5		Table Analyzed	Data 1	Number of values	49	101
0.002279	0.035792	-0.006		54.88	28.42
0.003039	0.051128	-0.00624		69.58	27.44		Column B	Data Set-B	Mean	57.64	31.74
0.003799	0.035897	-0.00412		61.74	30.38		vs.	vs.	Std. Deviation	8.7	5.932
0.004559	0.026323	0.000552		57.82	36.26		Column A	Data Set-A	Std. Error of Mean	1.243	0.5903
0.005319	0.041434	0.004644		62.72	20.58
0.006078	0.068334	0.003947		62.72	27.44		Mann Whitney test
0.006838	0.08737	-0.00102		61.74	24.5		P value	<0.0001
0.007598	0.094593	-0.005		68.6	23.52		Exact or approximate P value?	Exact
0.008358	0.085492	-0.00626		74.48	23.52		P value summary	****
0.009118	0.078406	-0.00387		65.66	24.5		Significantly different (P < 0.05)?	Yes
0.009877	0.064185	0.004573		73.5	27.44		One- or two-tailed P value?	Two-tailed
0.010637	0.069771	0.017579		72.52	30.38		Sum of ranks in column A,B	6130 , 5195
0.011397	0.073029	0.033869		66.64	39.2		Mann-Whitney U	44
0.012157	0.068647	0.044132		68.6	34.3
0.012917	0.061208	0.026764		64.68	27.44		Difference between medians
0.013677	0.075091	0.009865		62.72	28.42		Median of column A	57.82, n=49
0.014436	0.087338	0.008449		40.18	32.34		Median of column B	30.38, n=101
0.015196	0.115835	0.018407		50.96	31.36		Difference: Actual	-27.44
0.015956	0.250738	0.029023		48.02	26.46		Difference: Hodges-Lehmann	-26.46
0.016716	0.593068	0.018916		56.84	25.48
0.017476	0.909605	0.010514		43.12	28.42
0.018235	0.904027	0.009456		59.78	24.5		Number of values	49	101
0.018995	0.636765	0.019363		57.82	30.38
0.019755	0.386123	0.044711		52.92	25.48		Minimum	38.22	20.58
0.020515	0.330846	0.078398		38.22	27.44		25% Percentile	52.43	27.44
0.021275	0.363163	0.106174		48.02	22.54		Median	57.82	30.38
0.022034	0.294363	0.125992		51.94	25.48		75% Percentile	63.7	35.77
0.022794	0.243042	0.135207		57.82	28.42		Maximum	74.48	47.04
0.023554	0.293585	0.158006		59.78	24.5		Range	36.26	26.46
0.024314	0.45672	0.194432		40.18	28.42
0.025074	0.748251	0.232068		58.8	27.44		10% Percentile	45.08	24.5
0.025833	0.814643	0.319553		56.84	31.36		90% Percentile	68.6	40.96
0.026593	0.620867	0.394266		57.82	25.48
0.027353	0.687677	0.451533		46.06	34.3		Mean	57.64	31.74
0.028113	0.634935	0.672603		49	33.32		Std. Deviation	8.7	5.932
0.028873	0.705525	0.978828		50.96	35.28		Std. Error of Mean	1.243	0.5903
0.029632	0.730611	0.906885		58.8	33.32
0.030392	0.536202	0.682289		64.68	37.24		Coefficient of variation	15.09%	18.69%
0.031152	0.532622	0.653706		52.92	41.16
0.031912	0.636083	0.780476		60.76	44.1
0.032672	0.55429	0.917692		54.88	36.26
0.033431	0.791643	1		53.9	44.1
0.034191	0.767358	0.926792		52.92	30.38
0.034951	0.774076	0.77234		66.64	39.2
0.035711	0.803656	0.740717		56.84	39.2
0.036471	0.9859	0.680613		64.68	32.34
0.03723	1	0.51036		56.84	35.28
0.03799	0.645055	0.445728			36.26
0.03875	0.463253	0.38803			37.24
0.03951	0.359327	0.298802			44.1
0.04027	0.430871	0.209337			36.26
0.041029	0.518859	0.174705			45.08
0.041789	0.571705	0.1944			41.16
0.042549	0.671979	0.229063			47.04
0.043309	0.584778	0.221652			37.24
0.044069	0.439474	0.251439			35.28
0.044828	0.407245	0.460405			44.1
0.045588	0.351374	0.857217			42.14
0.046348	0.318984	0.977801			34.3
0.047108	0.365241	0.614777			33.32
0.047868	0.379952	0.264572			33.32
0.048627	0.243267	0.158834			29.4
0.049387	0.177067	0.107392			26.46
0.050147	0.158802	0.058299			33.32
0.050907	0.186986	0.034148			28.42
0.051667	0.235715	0.029685			28.42
0.052426	0.32599	0.0291			31.36
0.053186	0.412606	0.023082			30.38
0.053946	0.400014	0.014668			29.4
0.054706	0.343493	0.007112			27.44
0.055466	0.32518	0.005551			28.42
0.056225	0.294267	0.005268			33.32
0.056985	0.426088	0.00363			36.26
0.057745	0.726944	0.002994			40.18
0.058505	0.951961	0.002817			24.5
0.059265	0.855579	0.002185			24.5
0.060025	0.554395	0.000262			30.38
0.060784	0.451263	-1.7e-05			25.48
0.061544	0.34249	0.000287			32.34
0.062304	0.233412	-0.00213			25.48
0.063064	0.093718	-0.00705			26.46
0.063824	0.061216	-0.01101			27.44
0.064583	0.10334	-0.01256			28.42
0.065343	0.135882	-0.01243			26.46
0.066103	0.108468	-0.01184			21.56
0.066863	0.102851	-0.01096			29.4
0.067623	0.083221	-0.00893			28.42
0.068382	0.064089	-0.0069			33.32
0.069142	0.066168	-0.00534			35.28
0.069902	0.073262	-0.00421			36.26
0.070662	0.062115	-0.00473			37.24
0.071422	0.039692	-0.00585			41.16
0.072181	0.029918	-0.00503			34.3
0.072941	0.028947	-0.0022			31.36
0.073701	0.031098	0.000794			35.28
					26.46
					30.38
					35.28
					38.22

## Sheet: Figure 3
Panel c				Panel d
Line scan				Line scan				Graph
Distance	ExSTED	Confocal		Distance_(microns)	Gray_Value			25		Number of values	28
0	0	0.104242		0	-2e-05			27
0.003179	0	0.121817		0.0007	-2e-05			23		Mean	24.98
0.006359	0	0.077575		0.0015	-3e-05			24		Std. Deviation	2.251
0.009538	0.078193	0.069093		0.0022	-3e-05			25		Std. Error of Mean	0.4255
0.012717	0.013993	0.060606		0.003	-3e-05			23
0.015897	0	0.124849		0.0037	-3e-05			24.2
0.019076	0	0.133942		0.0044	-3e-05			24.5
0.022255	0	0.117578		0.0052	-2e-05			31
0.025435	0.0214	0.094544		0.0059	-2e-05			28
0.028614	0.0428	0.013942		0.0067	-2e-05			25.8
0.031794	0.037037	0.061211		0.0074	-1e-05			25.1
0.034973	0.004941	0.063033		0.0081	3e-06			25.9
0.038152	0	0.124244		0.0089	2e-05			22
0.041332	0	0.176362		0.0096	4e-05			26
0.044511	0	0.02424		0.0104	6e-05			23.7
0.04769	0	0.152728		0.0111	0.0001			24.41
0.05087	0	0.26303		0.0118	0.0001			25.1
0.054049	0	0.225453		0.0126	9e-05			23.1
0.057228	0	0.186666		0.0133	6e-05			21
0.060408	0	0.277577		0.0141	3e-05			26
0.063587	0.033748	0.255153		0.0148	7e-06			23.4
0.066767	0.193415	0.231513		0.0155	1e-05			25.9
0.069946	0.29383	0.53273		0.0163	2e-05			23.7
0.073125	0.273252	0.506063		0.017	2e-05			21.6
0.076305	0.280659	0.567274		0.0178	2e-05			26.2
0.079484	0.508644	0.553332		0.0185	2e-05			30
0.082663	0.65103	0.75394		0.0192	9e-05			25.9
0.085843	0.68477	0.790305		0.02	0.0003
0.089022	0.846089	0.693334		0.0207	0.0005
0.092201	0.845267	0.690307		0.0215	0.0006
0.095381	0.958844	0.705454		0.0222	0.0004
0.09856	0.942385	0.591514		0.0229	0.0003
0.101739	0.825511	0.590908		0.0237	0.0003
0.104919	0.696296	0.715152		0.0244	0.0002
0.108098	0.358844	0.695761		0.0252	0.0003
0.111277	0.128393	0.486061		0.0259	0.0004
0.114457	0.218104	0.450912		0.0266	0.0004
0.117636	0.035393	0.344242		0.0274	0.0006
0.120816	0.001644	0.407881		0.0281	0.0007
0.123995	0.136622	0.151517		0.0289	0.0009
0.127174	0.011526	0.152122		0.0296	0.0013
0.130354	0	0.242422		0.0303	0.0015
0.133533	0	0.171513		0.0311	0.0012
0.136712	0.116052	0.464848		0.0318	0.0008
0.139892	0.067489	0.205457		0.0326	0.0014
0.143071	0.259259	0.049091		0.0333	0.004
0.14625	0.016459	0.296968		0.034	0.0075
0.14943	0	0.281821		0.0348	0.0086
0.152609	0.352267	0.377575		0.0355	0.0062
0.155788	0.124281	0.355152		0.0363	0.0042
0.158968	0.110289	0.494548		0.037	0.0037
0.162147	0.0642	0.367272		0.0377	0.0042
0.165327	0.246089	0.467275		0.0385	0.0047
0.168506	0.282304	0.730305		0.0392	0.0039
0.171685	0.19177	0.644848		0.04	0.0039
0.174865	0.205763	0.723034		0.0407	0.0054
0.178044	0.530044	0.742425		0.0414	0.0062
0.181223	0.776956	0.767881		0.0422	0.0056
0.184403	0.798356	0.874545		0.0429	0.0046
0.187582	0.890533	0.939394		0.0437	0.0045
0.190761	0.854319	0.871518		0.0444	0.0054
0.193941	1	0.752729		0.0451	0.006
0.19712	0.924281	0.989091		0.0459	0.0052
0.2003	0.785185	0.918787		0.0466	0.0036
0.203479	0.734156	0.706059		0.0474	0.0032
0.206658	0.655141	0.724245		0.0481	0.0047
0.209838	0.626341	0.525454		0.0488	0.0051
0.213017	0.416459	0.61697		0.0496	0.0026
0.216196	0.209052	0.39515		0.0503	0.0011
0.219376	0.395881	0.562425		0.0511	0.0012
0.222555	0.597533	0.291513		0.0518	0.0023
0.225734	0.199178	0.438181		0.0525	0.0048
0.228914	0.620578	0.461821		0.0533	0.0067
0.232093	0.177778	0.321213		0.054	0.0065
0.235272	0.294652	0.480606		0.0548	0.0044
0.238452	0.002467	0.22788		0.0555	0.0029
0.241631	0.194237	0.288486		0.0562	0.0023
0.24481	0.266667	0.004244		0.057	0.0027
0.24799	0.048563	0.312726		0.0577	0.0044
0.251169	0.092178	0		0.0585	0.0036
0.254349	0.000822	0.007271		0.0592	0.0019
0.257528	0.019756	0.350908		0.0599	0.0009
0.260707	0.030452	0.321213		0.0607	0.0006
0.263887	0.010696	0.242422		0.0614	0.0005
0.267066	0.10617	0.210306		0.0622	0.0005
0.270245	0.0214	0.41879		0.0629	0.0004
0.273425	0.418933	0.54485		0.0636	0.0002
0.276604	0.366252	0.456366		0.0644	0.0001
0.279783	0.441156	0.498786		0.0651	5e-05
0.282963	0.099585	0.503635		0.0659	4e-05
0.286142	0.427163	0.684852		0.0666	3e-05
0.289321	0.866667	0.738787		0.0673	2e-05
0.292501	0.534156	0.655152		0.0681	2e-05
0.29568	0.90617	1		0.0688	3e-05
0.29886	0.367904	0.482423		0.0696	3e-05
0.302039	0.595881	0.776969		0.0703	3e-05
0.305218	0.334978	0.524848		0.071	2e-05
0.308398	0.452674	0.713941		0.0718	-2e-06
0.311577	0.687244	0.656363		0.0725	-2e-05
0.314756	0.310289	0.529697		0.0733	-2e-05
0.317936	0.512756	0.746063		0.074	-2e-05
0.321115	0.680659	0.665456		0.0747	2e-05
0.324294	0.427985	0.732121		0.0755	0.0001
0.327474	0.28477	0.589092		0.0762	0.0002
0.330653	0.154733	0.376364		0.077	0.0001
0.333833	0.331689	0.44303		0.0777	3e-05
0.337012	0.118519	0.150306		0.0784	1e-05
0.340191	0.364607	0.378786		0.0792	3e-05
0.343371	0.000822	0.303033		0.0799	2e-05
0.34655	0.024689	0.375759		0.0807	6e-06
0.349729	0.288889	0.395761		0.0814	-2e-05
0.352909	0.108644	0.249699		0.0821	-3e-05
0.356088	0.210696	0.45515		0.0829	-3e-05
0.359267	0.181067	0.35273		0.0836	-3e-05
0.362447	0.669133	0.290908		0.0844	-3e-05
0.365626	0.214815	0.25697		0.0851	-4e-05
0.368805	0.397533	0.309699		0.0858	-4e-05
0.371985	0.299585	0.313942		0.0866	-4e-05
0.375164	0.417281	0.532125		0.0873	-4e-05
0.378343	0.553089	0.526059		0.0881	-4e-05
0.381523	0.184363	0.323635		0.0888	-4e-05
0.384702	0.468311	0.495759		0.0895	-3e-05
0.387882	0.318519	0.413335		0.0903	-3e-05
0.391061	0.2428	0.249093		0.091	-2e-05
0.39424	0.269133	0.359395		0.0918	-2e-05
0.39742	0.066667	0.395761		0.0925	-3e-05
0.400599	0.198356	0.299395		0.0932	-3e-05
0.403778	0.007407	0.302422		0.094	-3e-05
0.406958	0.030452	0.285453		0.0947	-4e-05
0.410137	0.005763	0.25091
0.413316	0	0.31091
0.416496	0	0.350908
0.419675	0.013993	0.357579
0.422854	0.083126	0.494548
0.426034	0.014815	0.373332
0.429213	0.059259	0.360001
0.432393	0.018933	0.330306
0.435572	0.05103	0.283031
0.438751	0.111111	0.354546
0.441931	0.012348	0.296362
0.44511	0.065844	0.357579
0.448289	0.062548	0.055756
0.451469	0.003289	0.240606
0.454648	0.032919	0.283031

## Sheet: Figure 4
Panel d
Distance	Ideal	Modeled	Achieved
0	0	0.014945	0
0.7519	0	0.037385	0.03514
1.5038	0	0.044693	0.062655
2.2556	0	0.02235	0.134936
3.0075	0	0.015326	0.115104
3.7594	0	0.044955	0.14064
4.5113	0	0.053018	0.131597
5.2632	0	0.088841	0.124036
6.015	0	0.051927	0.109057
6.7669	0	0.036302	0.128956
7.5188	0	0	0.150563
8.2707	0	0.0013	0.174329
9.0226	0	0.039634	0.213318
9.7744	0	0.098683	0.273967
10.5263	0	0.136494	0.255544
11.2782	0.000185	0.181471	0.269337
12.0301	0.004343	0.226448	0.310323
12.782	0.013531	0.271022	0.36243
13.5338	0.046989	0.310634	0.377845
14.2857	0.112444	0.388737	0.46421
15.0376	0.213877	0.515704	0.456889
15.7895	0.353699	0.628689	0.471285
16.5414	0.513648	0.651487	0.431861
17.2932	0.692817	0.771302	0.496745
18.0451	0.832291	0.794363	0.677464
18.797	0.931752	0.824343	0.823601
19.5489	0.987542	0.853104	0.979023
20.3008	0.99798	0.86873	0.907195
21.0526	0.946995	0.894532	0.979306
21.8045	0.859204	0.952445	1
22.5564	0.766473	0.988507	0.965923
23.3083	0.699109	1	0.9226
24.0602	0.669447	0.916098	0.901475
24.812	0.657576	0.880648	0.912427
25.5639	0.643579	0.807036	0.933538
26.3158	0.609735	0.803726	0.826823
27.0677	0.558739	0.772887	0.750715
27.8195	0.515869	0.733656	0.700139
28.5714	0.511273	0.682984	0.616466
29.3233	0.53252	0.649193	0.55041
30.0752	0.562684	0.64453	0.506164
30.8271	0.57889	0.656614	0.471158
31.5789	0.567828	0.663025	0.523387
32.3308	0.538316	0.755393	0.575178
33.0827	0.525778	0.803913	0.688507
33.8346	0.538189	0.787809	0.770199
34.5865	0.581209	0.816825	0.814859
35.3383	0.642183	0.883182	0.75767
36.0902	0.686075	0.930662	0.790979
36.8421	0.711046	0.911652	0.814527
37.594	0.745202	0.906922	0.834279
38.3459	0.797785	0.879348	0.889398
39.0977	0.878881	0.870508	0.850868
39.8496	0.962625	0.882965	0.835383
40.6015	1	0.854427	0.837052
41.3534	0.976456	0.861616	0.787464
42.1053	0.889616	0.825008	0.71468
42.8571	0.760532	0.753495	0.572841
43.609	0.600784	0.651203	0.461935
44.3609	0.435308	0.502148	0.335209
45.1128	0.278294	0.39822	0.296138
45.8647	0.15288	0.333642	0.287369
46.6165	0.073558	0.278233	0.291693
47.3684	0.030787	0.213745	0.318004
48.1203	0.010237	0.161273	0.283928
48.8722	0.003132	0.10419	0.281382
49.6241	0	0.05576	0.271987
50.3759	0	0.090807	0.201218
51.1278	0	0.062426	0.151197
51.8797	0	0.052995	0.144267
52.6316	0	0.075577	0.139774
53.3835	0	0.050627	0.149384
54.1353	0	0.058458	0.16156
54.8872	0	0.097711	0.151971
55.6391	0	0.076474	0.166648
56.391	0	0.073328	0.110531
57.1429	0	0.041241	0.126963
57.8947	0	0.033529	0.12604
58.6466	0	0.03746	0.127124
59.3985	0	0.013077	0.099792

## Sheet: Sup Fig. 1
Panel g
0.124309	0.24976
0.248619	0.2429
0.372928	0.24486
0.497238	0.24388
0.621547	0.24094
0.745856	0.238
0.870166	0.23604
0.994475	0.23604
1.11878	0.23408
1.24309	0.22821
1.3674	0.22429
1.49171	0.22331
1.61602	0.23115
1.74033	0.23702
1.86464	0.238
1.98895	0.238
2.11326	0.23017
2.23757	0.22233
2.36188	0.2145
2.48619	0.20764
2.6105	0.20862
2.73481	0.20764
2.85912	0.20764
2.98342	0.20666
3.10773	0.20372
3.23204	0.2096
3.35635	0.21156
3.48066	0.20372
3.60497	0.20372
3.72928	0.20568
3.85359	0.2047
3.9779	0.20568
4.10221	0.22135
4.22652	0.22919
4.35083	0.238
4.47514	0.23898
4.59945	0.23898
4.72376	0.25759
4.84807	0.25759
4.97238	0.25661
5.09668	0.25661
5.22099	0.25955
5.3453	0.26249
5.46961	0.26249
5.59392	0.26249
5.71823	0.25269
5.84254	0.25269
5.96685	0.2478
6.09116	0.24388
6.21547	0.24388
6.33978	0.2429
6.46409	0.24878
6.5884	0.25269
6.71271	0.25171
6.83702	0.26053
6.96133	0.26053
7.08563	0.26151
7.20995	0.2811
7.33425	0.29089
7.45856	0.3046
7.58287	0.31244
7.70718	0.32321
7.83149	0.32615
7.9558	0.32909
8.08011	0.33399
8.20442	0.32615
8.32873	0.32811
8.45304	0.32811
8.57735	0.32811
8.70166	0.32125
8.82597	0.3095
8.95028	0.32027
9.07459	0.32027
9.1989	0.30558
9.3232	0.29285
9.44751	0.29677
9.57182	0.29187
9.69613	0.30656
9.82044	0.30656
9.94475	0.29383
10.0691	0.28795
10.1934	0.28404
10.3177	0.27032
10.442	0.27032
10.5663	0.28599
10.6906	0.28208
10.8149	0.29579
10.9392	0.29481
11.0635	0.3095
11.1878	0.31538
11.3122	0.33986
11.4365	0.34966
11.5608	0.36435
11.6851	0.36435
11.8094	0.37806
11.9337	0.38981
12.058	0.39961
12.1823	0.40353
12.3066	0.40646
12.4309	0.40451
12.5552	0.40548
12.6796	0.40646
12.8039	0.41724
12.9282	0.41724
13.0525	0.41626
13.1768	0.42997
13.3011	0.43976
13.4254	0.43976
13.5497	0.45152
13.674	0.45446
13.7983	0.44564
13.9227	0.4427
14.047	0.45935
14.1713	0.45446
14.2956	0.47698
14.4199	0.47796
14.5442	0.476
14.6685	0.4858
14.7928	0.48482
14.9171	0.48188
15.0414	0.48874
15.1657	0.48874
15.2901	0.48776
15.4144	0.48188
15.5387	0.48874
15.663	0.49853
15.7873	0.49559
15.9116	0.50833
16.0359	0.51224
16.1602	0.50735
16.2845	0.50245
16.4088	0.50833
16.5331	0.50735
16.6575	0.50049
16.7818	0.49363
16.9061	0.49265
17.0304	0.50539
17.1547	0.50539
17.279	0.52987
17.4033	0.54456
17.5276	0.55534
17.6519	0.5524
17.7762	0.56905
17.9005	0.57982
18.0249	0.58374
18.1492	0.60333
18.2735	0.61312
18.3978	0.63075
18.5221	0.62782
18.6464	0.61998
18.7707	0.6288
18.895	0.61998
19.0193	0.62782
19.1437	0.63075
19.268	0.62194
19.3923	0.62096
19.5166	0.62096
19.6409	0.62684
19.7652	0.6239
19.8895	0.61606
20.0138	0.60725
20.1381	0.61312
20.2624	0.62488
20.3867	0.62488
20.5111	0.62684
20.6354	0.64447
20.7597	0.64447
20.884	0.63859
21.0083	0.65818
21.1326	0.71009
21.2569	0.71303
21.3812	0.71107
21.5055	0.72968
21.6298	0.72968
21.7541	0.69931
21.8785	0.70323
22.0028	0.70323
22.1271	0.71596
22.2514	0.71205
22.3757	0.73457
22.5	0.7287
22.6243	0.73849
22.7486	0.73947
22.8729	0.74927
22.9972	0.74927
23.1215	0.77963
23.2459	0.78452
23.3702	0.76787
23.4945	0.78257
23.6188	0.79726
23.7431	0.78648
23.8674	0.77081
23.9917	0.77081
24.116	0.76787
24.2403	0.74829
24.3646	0.74829
24.4889	0.75808
24.6133	0.75514
24.7376	0.75514
24.8619	0.73751
24.9862	0.72674
25.1105	0.72674
25.2348	0.71401
25.3591	0.70715
25.4834	0.70715
25.6077	0.6905
25.732	0.68364
25.8563	0.68364
25.9807	0.66993
26.105	0.68462
26.2293	0.68462
26.3536	0.69736
26.4779	0.71988
26.6022	0.71988
26.7265	0.75416
26.8508	0.77963
26.9751	0.77963
27.0995	0.79236
27.2238	0.7953
27.3481	0.80705
27.4724	0.80901
27.5967	0.80509
27.721	0.79334
27.8453	0.79138
27.9696	0.81195
28.0939	0.80901
28.2182	0.81587
28.3425	0.80313
28.4669	0.78942
28.5912	0.78942
28.7155	0.79726
28.8398	0.79726
28.9641	0.79726
29.0884	0.82076
29.2127	0.8286
29.337	0.8286
29.4613	0.8286
29.5856	0.82566
29.7099	0.83643
29.8343	0.81783
29.9586	0.81978
30.0829	0.82076
30.2072	0.80509
30.3315	0.80901
30.4558	0.79432
30.5801	0.78257
30.7044	0.7669
30.8287	0.76983
30.953	0.74927
31.0773	0.73359
31.2017	0.71792
31.326	0.70911
31.4503	0.71694
31.5746	0.69736
31.6989	0.70519
31.8232	0.6905
31.9475	0.67091
32.0718	0.67091
32.1961	0.64447
32.3204	0.64153
32.4447	0.63761
32.5691	0.63761
32.6934	0.64349
32.8177	0.64936
32.942	0.66797
33.0663	0.66601
33.1906	0.67679
33.3149	0.67581
33.4392	0.67973
33.5635	0.68854
33.6878	0.68462
33.8122	0.69833
33.9365	0.69442
34.0608	0.69442
34.1851	0.68462
34.3094	0.65426
34.4337	0.63761
34.558	0.63761
34.6823	0.61998
34.8066	0.61606
34.9309	0.59941
35.0553	0.60431
35.1796	0.60823
35.3039	0.60431
35.4282	0.59549
35.5525	0.58668
35.6768	0.59452
35.8011	0.58472
35.9254	0.58668
36.0497	0.59256
36.174	0.59843
36.2983	0.58668
36.4226	0.58864
36.547	0.59354
36.6713	0.59354
36.7956	0.57689
36.9199	0.55926
37.0442	0.54065
37.1685	0.54065
37.2928	0.52693
37.4171	0.53477
37.5414	0.52106
37.6658	0.50147
37.7901	0.4858
37.9144	0.47502
38.0387	0.4476
38.163	0.4427
38.2873	0.43487
38.4116	0.43487
38.5359	0.43389
38.6602	0.42605
38.7845	0.4143
38.9088	0.39961
39.0331	0.39569
39.1575	0.39471
39.2818	0.36827
39.4061	0.36239
39.5304	0.36435
39.6547	0.36435
39.779	0.36631
39.9033	0.35847
40.0276	0.36141
40.1519	0.35945
40.2762	0.36337
40.4006	0.35847
40.5249	0.35162
40.6492	0.34672
40.7735	0.33595
40.8978	0.33105
41.0221	0.32027
41.1464	0.33203
41.2707	0.32419
41.395	0.33497
41.5193	0.33497
41.6437	0.32517
41.768	0.32615
41.8923	0.33692
42.0166	0.33399
42.1409	0.3428
42.2652	0.33986
42.3895	0.34378
42.5138	0.33692
42.6381	0.34378
42.7624	0.33301
42.8867	0.33497
43.011	0.33497
43.1354	0.33301
43.2597	0.33007
43.384	0.33301
43.5083	0.33007
43.6326	0.3095
43.7569	0.3095
43.8812	0.3095
44.0055	0.29481
44.1298	0.28991
44.2541	0.28991
44.3785	0.27914
44.5028	0.27914
44.6271	0.27522
44.7514	0.26641
44.8757	0.26151
45	0.26445
45.1243	0.24878
45.2486	0.24682
45.3729	0.25465
45.4972	0.25465
45.6215	0.24486
45.7459	0.2429
45.8702	0.24682
45.9945	0.24878
46.1188	0.25171
46.2431	0.24976
46.3674	0.25661
46.4917	0.25269
46.616	0.26053
46.7403	0.25465
46.8646	0.24976
46.989	0.24976
47.1133	0.24584
47.2376	0.26641
47.3619	0.2811
47.4862	0.28599
47.6105	0.30069
47.7348	0.29775
47.8591	0.29579
47.9834	0.30069
48.1077	0.3046
48.232	0.30069
48.3563	0.29383
48.4807	0.29285
48.605	0.28599
48.7293	0.28599
48.8536	0.28208
48.9779	0.27522
49.1022	0.27424
49.2265	0.27228
49.3508	0.26738
49.4751	0.26347
49.5994	0.26053
49.7238	0.25759
49.8481	0.26151
49.9724	0.26347
50.0967	0.26151
50.221	0.26836
50.3453	0.27326
50.4696	0.28306
50.5939	0.29383
50.7182	0.29383
50.8425	0.30362
50.9669	0.30558
51.0912	0.30558
51.2155	0.31244
51.3398	0.31244
51.4641	0.3144
51.5884	0.30362
51.7127	0.29383
51.837	0.29383
51.9613	0.29481
52.0856	0.28208
52.2099	0.28795
52.3342	0.27914
52.4586	0.27326
52.5829	0.27522
52.7072	0.2762
52.8315	0.27522
52.9558	0.26641
53.0801	0.26347
53.2044	0.26445
53.3287	0.26836
53.453	0.25857
53.5774	0.25955
53.7017	0.26445
53.826	0.26836
53.9503	0.26151
54.0746	0.26151
54.1989	0.26151
54.3232	0.26836
54.4475	0.27032
54.5718	0.28599
54.6961	0.28893
54.8204	0.31538
54.9447	0.32125
55.0691	0.3526
55.1934	0.36239
55.3177	0.35749
55.442	0.36533
55.5663	0.36043
55.6906	0.36533
55.8149	0.35455
55.9392	0.35651
56.0635	0.35847
56.1878	0.34574
56.3122	0.3428
56.4365	0.33105
56.5608	0.33105
56.6851	0.33007
56.8094	0.33105
56.9337	0.33888
57.058	0.34476
57.1823	0.35357
57.3066	0.37023
57.4309	0.37806
57.5553	0.3859
57.6796	0.39961
57.8039	0.4192
57.9282	0.4192
58.0525	0.41626
58.1768	0.43389
58.3011	0.43193
58.4254	0.43389
58.5497	0.4427
58.674	0.45054
58.7983	0.46229
58.9226	0.47209
59.047	0.46425
59.1713	0.47209
59.2956	0.47307
59.4199	0.47307
59.5442	0.4809
59.6685	0.49265
59.7928	0.4809
59.9171	0.49363
60.0414	0.49951
60.1658	0.51322
60.2901	0.5191
60.4144	0.52204
60.5387	0.51322
60.663	0.52204
60.7873	0.53477
60.9116	0.53477
61.0359	0.53673
61.1602	0.55926
61.2845	0.56905
61.4088	0.56415
61.5331	0.56709
61.6575	0.5573
61.7818	0.5524
61.9061	0.53869
62.0304	0.54163
62.1547	0.55828
62.279	0.55436
62.4033	0.56024
62.5276	0.56024
62.6519	0.57199
62.7762	0.59452
62.9006	0.60529
63.0249	0.60529
63.1492	0.61019
63.2735	0.62977
63.3978	0.64643
63.5221	0.65916
63.6464	0.67189
63.7707	0.69442
63.895	0.72184
64.0193	0.73262
64.1436	0.73457
64.268	0.73457
64.3923	0.7238
64.5166	0.73653
64.6409	0.74143
64.7652	0.74045
64.8895	0.75416
65.0138	0.77669
65.1381	0.78844
65.2624	0.79628
65.3867	0.80411
65.511	0.82468
65.6354	0.81978
65.7597	0.83448
65.884	0.85309
66.0083	0.85309
66.1326	0.86288
66.2569	0.85309
66.3812	0.857
66.5055	0.86484
66.6298	0.86288
66.7541	0.86876
66.8785	0.8668
67.0028	0.86778
67.1271	0.87071
67.2514	0.86974
67.3757	0.857
67.5	0.84525
67.6243	0.8335
67.7486	0.82566
67.8729	0.82566
67.9972	0.8237
68.1215	0.81195
68.2459	0.80901
68.3702	0.80607
68.4945	0.81195
68.6188	0.82664
68.7431	0.82076
68.8674	0.82566
68.9917	0.82958
69.116	0.83154
69.2403	0.82076
69.3646	0.82762
69.489	0.84231
69.6133	0.84231
69.7376	0.83252
69.8619	0.84721
69.9862	0.84525
70.1105	0.85113
70.2348	0.85113
70.3591	0.8668
70.4834	0.85994
70.6077	0.86288
70.732	0.84721
70.8564	0.84917
70.9807	0.83154
71.105	0.81978
71.2293	0.81195
71.3536	0.81195
71.4779	0.81195
71.6022	0.82174
71.7265	0.80313
71.8508	0.80313
71.9751	0.79334
72.0995	0.76983
72.2238	0.75906
72.3481	0.74437
72.4724	0.74143
72.5967	0.71596
72.721	0.71792
72.8453	0.71596
72.9696	0.74927
73.0939	0.7287
73.2182	0.73849
73.3425	0.73849
73.4668	0.75024
73.5912	0.75318
73.7155	0.7571
73.8398	0.75122
73.9641	0.75612
74.0884	0.74927
74.2127	0.74143
74.337	0.71792
74.4613	0.71107
74.5856	0.70911
74.7099	0.71009
74.8342	0.71107
74.9586	0.70813
75.0829	0.69246
75.2072	0.69246
75.3315	0.68952
75.4558	0.68658
75.5801	0.67679
75.7044	0.68168
75.8287	0.67189
75.953	0.66503
76.0773	0.65132
76.2017	0.63859
76.326	0.64545
76.4503	0.64838
76.5746	0.63369
76.6989	0.62782
76.8232	0.62096
76.9475	0.62096
77.0718	0.60529
77.1961	0.59158
77.3204	0.58374
77.4447	0.58178
77.5691	0.56317
77.6934	0.56709
77.8177	0.55534
77.942	0.55338
78.0663	0.5475
78.1906	0.54946
78.3149	0.55436
78.4392	0.54652
78.5635	0.54456
78.6878	0.53869
78.8122	0.53477
78.9365	0.5191
79.0608	0.49657
79.1851	0.4907
79.3094	0.48482
79.4337	0.46915
79.558	0.45642
79.6823	0.4476
79.8066	0.45446
79.9309	0.46131
80.0553	0.45348
80.1796	0.45348
80.3039	0.44956
80.4282	0.43976
80.5525	0.43291
80.6768	0.42605
80.8011	0.43193
80.9254	0.4192
81.0497	0.40255
81.174	0.38786
81.2983	0.38296
81.4227	0.37414
81.547	0.37414
81.6713	0.3761
81.7956	0.38002
81.9199	0.36729
82.0442	0.35651
82.1685	0.35064
82.2928	0.35064
82.4171	0.34868
82.5414	0.34182
82.6658	0.34378
82.7901	0.33692
82.9144	0.34378
83.0387	0.34378
83.163	0.3428
83.2873	0.3428
83.4116	0.34182
83.5359	0.33888
83.6602	0.35162
83.7845	0.34966
83.9088	0.34084
84.0332	0.33301
84.1575	0.33007
84.2818	0.32517
84.4061	0.32517
84.5304	0.32027
84.6547	0.32027
84.779	0.32615
84.9033	0.31734
85.0276	0.32419
85.1519	0.31244
85.2762	0.30852
85.4005	0.31342
85.5249	0.31146
85.6492	0.30656
85.7735	0.3095
85.8978	0.30362
86.0221	0.29971
86.1464	0.29187
86.2707	0.28599
86.395	0.28404
86.5193	0.28306
86.6436	0.26543
86.768	0.27326
86.8923	0.27326
87.0166	0.26836
87.1409	0.27424
87.2652	0.2762
87.3895	0.27424
87.5138	0.26934
87.6381	0.2713
87.7624	0.2762
87.8867	0.2762
88.011	0.2762
88.1354	0.26934
88.2597	0.26738
88.384	0.25661
88.5083	0.26151
88.6326	0.25073
88.7569	0.25073
88.8812	0.24976
89.0055	0.2478
89.1298	0.2478
89.2541	0.2429
89.3785	0.23996
89.5028	0.23115
89.6271	0.22429
89.7514	0.22135
89.8757	0.21841
90	0.22037
90.1243	0.22919
90.2486	0.23213
90.3729	0.23115
90.4972	0.23115
90.6215	0.23213
90.7459	0.23017
90.8702	0.22429
90.9945	0.22625
91.1188	0.22625
91.2431	0.22527
91.3674	0.23115
91.4917	0.2331
91.616	0.22527
91.7403	0.21939
91.8646	0.21743
91.989	0.20666
92.1133	0.20666
92.2376	0.20568
92.3619	0.19882
92.4862	0.20274
92.6105	0.20274
92.7348	0.19687
92.8591	0.20372
92.9834	0.20274
93.1077	0.2047
93.232	0.19785
93.3564	0.17924
93.4807	0.18022
93.605	0.17924
93.7293	0.17826
93.8536	0.17826
93.9779	0.17728
94.1022	0.17924
94.2265	0.18511
94.3508	0.18022
94.4751	0.18119
94.5995	0.19001
94.7238	0.18707
94.8481	0.18903
94.9724	0.19785
95.0967	0.20176
95.221	0.20078
95.3453	0.20666
95.4696	0.20176
95.5939	0.20176
95.7182	0.19882
95.8425	0.19393
95.9668	0.19001
96.0912	0.18609
96.2155	0.18511
96.3398	0.18511
96.4641	0.18903
96.5884	0.19197
96.7127	0.19197
96.837	0.19882
96.9613	0.20176
97.0856	0.20176
97.2099	0.20274
97.3342	0.20666
97.4586	0.21156
97.5829	0.21939
97.7072	0.2331
97.8315	0.2331
97.9558	0.22821
98.0801	0.22821
98.2044	0.23213
98.3287	0.23604
98.453	0.23408
98.5773	0.23996
98.7017	0.23604
98.826	0.2478
98.9503	0.24388
99.0746	0.25073
99.1989	0.25269
99.3232	0.25269
99.4475	0.26738
99.5718	0.26249
99.6961	0.27816
99.8204	0.27816
99.9447	0.30754
100.069	0.30362
100.193	0.31636
100.318	0.31538
100.442	0.32713
100.566	0.32811
100.691	0.32713
100.815	0.31734
100.939	0.31538
101.064	0.3095
101.188	0.3095
101.312	0.30656
101.436	0.30656
101.561	0.31342
101.685	0.3046
101.809	0.3046
101.934	0.3144
102.058	0.32027
102.182	0.32713
102.307	0.34084
102.431	0.34084
102.555	0.36435
102.68	0.37708
102.804	0.38883
102.928	0.38883
103.052	0.39863
103.177	0.41822
103.301	0.41528
103.425	0.42116
103.55	0.41724
103.674	0.42605
103.798	0.43193
103.923	0.44564
104.047	0.44662
104.171	0.45446
104.296	0.46621
104.42	0.46915
104.544	0.47209
104.668	0.47209
104.793	0.46915
104.917	0.45642
105.041	0.46033
105.166	0.46327
105.29	0.46033
105.414	0.47307
105.539	0.47111
105.663	0.47111
105.787	0.476
105.912	0.4809
106.036	0.47405
106.16	0.4858
106.284	0.48384
106.409	0.49559
106.533	0.5191
106.657	0.5191
106.782	0.54065
106.906	0.54456
107.03	0.5573
107.155	0.5573
107.279	0.56807
107.403	0.57591
107.528	0.60039
107.652	0.61019
107.776	0.61802
107.901	0.62194
108.025	0.62684
108.149	0.64055
108.273	0.64643
108.398	0.66405
108.522	0.68364
108.646	0.68364
108.771	0.67581
108.895	0.68168
109.019	0.68168
109.144	0.68364
109.268	0.69148
109.392	0.70519
109.517	0.70519
109.641	0.6905
109.765	0.69344
109.889	0.71303
110.014	0.7189
110.138	0.71694
110.262	0.72282
110.387	0.72282
110.511	0.7287
110.635	0.73555
110.76	0.75024
110.884	0.73555
111.008	0.74045
111.133	0.73555
111.257	0.73066
111.381	0.73066
111.505	0.71009
111.63	0.73457
111.754	0.73457
111.879	0.74339
112.003	0.76102
112.127	0.77571
112.251	0.80803
112.376	0.83252
112.5	0.81881
112.624	0.83937
112.749	0.85113
112.873	0.84623
112.997	0.85015
113.121	0.85113
113.246	0.85015
113.37	0.83937
113.495	0.82468
113.619	0.81978
113.743	0.81978
113.867	0.78159
113.992	0.79138
114.116	0.79138
114.24	0.80215
114.365	0.80803
114.489	0.80803
114.613	0.8237
114.738	0.82076
114.862	0.82762
114.986	0.83546
115.111	0.84917
115.235	0.84427
115.359	0.86288
115.483	0.86778
115.608	0.85211
115.732	0.87365
115.856	0.86484
115.981	0.87365
116.105	0.87855
116.229	0.87855
116.354	0.86092
116.478	0.84035
116.602	0.84035
116.727	0.83448
116.851	0.79628
116.975	0.79628
117.099	0.77375
117.224	0.75122
117.348	0.73359
117.472	0.74143
117.597	0.72478
117.721	0.73164
117.845	0.74731
117.97	0.73359
118.094	0.75318
118.218	0.75906
118.343	0.75024
118.467	0.76787
118.591	0.77179
118.716	0.76787
118.84	0.77081
118.964	0.76592
119.088	0.77865
119.213	0.77865
119.337	0.77571
119.461	0.762
119.586	0.74829
119.71	0.71107
119.834	0.69148
119.959	0.6856
120.083	0.65034
120.207	0.64349
120.332	0.63467
120.456	0.6141
120.58	0.61019
120.704	0.59941
120.829	0.59941
120.953	0.57982
121.077	0.57297
121.202	0.57297
121.326	0.56219
121.45	0.56121
121.575	0.54652
121.699	0.54946
121.823	0.5573
121.948	0.56317
122.072	0.56415
122.196	0.56611
122.32	0.56024
122.445	0.55338
122.569	0.5524
122.693	0.55436
122.818	0.53967
122.942	0.54065
123.066	0.53183
123.191	0.52791
123.315	0.53575
123.439	0.54848
123.564	0.5475
123.688	0.54261
123.812	0.5475
123.936	0.55828
124.061	0.55828
124.185	0.53771
124.309	0.51518
124.434	0.50441
124.558	0.50441
124.682	0.48776
124.807	0.4809
124.931	0.47111
125.055	0.46719
125.18	0.46033
125.304	0.4525
125.428	0.44172
125.552	0.44172
125.677	0.44172
125.801	0.42899
125.925	0.42018
126.05	0.40157
126.174	0.40157
126.298	0.39373
126.423	0.39471
126.547	0.39471
126.671	0.39471
126.796	0.39471
126.92	0.39079
127.044	0.37218
127.168	0.35651
127.293	0.35651
127.417	0.34182
127.541	0.3379
127.666	0.32615
127.79	0.32517
127.914	0.32125
128.039	0.32811
128.163	0.32027
128.287	0.3144
128.412	0.3144
128.536	0.31048
128.66	0.30656
128.785	0.29971
128.909	0.30264
129.033	0.29873
129.157	0.29873
129.282	0.29775
129.406	0.30264
129.53	0.28991
129.655	0.28991
129.779	0.28306
129.903	0.27914
130.028	0.27718
130.152	0.27816
130.276	0.27326
130.401	0.27326
130.525	0.27424
130.649	0.26738
130.774	0.26543
130.898	0.25759
131.022	0.25759
131.146	0.24094
131.271	0.2331
131.395	0.23702
131.519	0.23702
131.644	0.23213
131.768	0.23213
131.892	0.22821
132.017	0.21841
132.141	0.21645
132.265	0.22037
132.389	0.22037
132.514	0.21645
132.638	0.2145
132.762	0.20274
132.887	0.20078
133.011	0.1998
133.135	0.18903
133.26	0.18217
133.384	0.16944
133.508	0.16063
133.633	0.16063
133.757	0.15377
133.881	0.15377
134.006	0.14789
134.13	0.14398
134.254	0.14398
134.379	0.13614
134.503	0.13222
134.627	0.13614
134.751	0.13908
134.876	0.14104
135	0.14398
135.124	0.15181
135.249	0.15279
135.373	0.15279
135.497	0.15279
135.621	0.15769
135.746	0.15181
135.87	0.15671
135.994	0.15965
136.119	0.15475
136.243	0.15475
136.367	0.15377
136.492	0.15377
136.616	0.15671
136.74	0.16259
136.865	0.1665
136.989	0.1714
137.113	0.17238
137.238	0.17826
137.362	0.18217
137.486	0.18609
137.611	0.19197
137.735	0.19001
137.859	0.18315
137.983	0.18315
138.108	0.18315
138.232	0.18022
138.356	0.18315
138.481	0.18511
138.605	0.18707
138.729	0.19197
138.854	0.18413
138.978	0.19001
139.102	0.19099
139.226	0.19099
139.351	0.19001
139.475	0.19197
139.599	0.19393
139.724	0.19197
139.848	0.19197
139.972	0.19687
140.097	0.19491
140.221	0.19687
140.345	0.20372
140.47	0.20568
140.594	0.20764
140.718	0.2145
140.843	0.22625
140.967	0.23604
141.091	0.23996
141.215	0.24682
141.34	0.25269
141.464	0.25073
141.588	0.2713
141.713	0.2762
141.837	0.28012
141.961	0.28012
142.086	0.29187
142.21	0.30754
142.334	0.30558
142.459	0.30362
142.583	0.29677
142.707	0.29383
142.832	0.30167
142.956	0.3144
143.08	0.3144
143.204	0.30852
143.329	0.32713
143.453	0.32027
143.577	0.31929
143.702	0.32419
143.826	0.31342
143.95	0.32223
144.075	0.3379
144.199	0.3379
144.323	0.33692
144.447	0.33497
144.572	0.34868
144.696	0.3477
144.82	0.34966
144.945	0.36141
145.069	0.36925
145.193	0.3712
145.318	0.36533
145.442	0.36533
145.566	0.37708
145.691	0.37708
145.815	0.39667
145.939	0.39667
146.064	0.41136
146.188	0.41528
146.312	0.44466
146.436	0.43389
146.561	0.46229
146.685	0.46327
146.809	0.46327
146.934	0.47796
147.058	0.48874
147.182	0.4858
147.307	0.49167
147.431	0.49265
147.555	0.49265
147.68	0.49657
147.804	0.50049
147.928	0.51028
148.053	0.50539
148.177	0.524
148.301	0.52106
148.425	0.51812
148.55	0.50637
148.674	0.51126
148.798	0.5093
148.923	0.50245
149.047	0.50049
149.171	0.51028
149.296	0.52498
149.42	0.52498
149.544	0.52302
149.668	0.52302
149.793	0.53771
149.917	0.55632
150.041	0.56905
150.166	0.57395
150.29	0.57591
150.414	0.57591
150.539	0.58864
150.663	0.59941
150.787	0.61214
150.912	0.63173
151.036	0.62977
151.16	0.62977
151.285	0.63173
151.409	0.64055
151.533	0.65132
151.657	0.65426
151.782	0.68364
151.906	0.69638
152.03	0.68364
152.155	0.6905
152.279	0.68952
152.403	0.69736
152.528	0.67287
152.652	0.68266
152.776	0.68266
152.901	0.67189
153.025	0.68756
153.149	0.68854
153.274	0.7189
153.398	0.72184
153.522	0.72086
153.646	0.72968
153.771	0.74241
153.895	0.73066
154.019	0.74927
154.144	0.75808
154.268	0.76787
154.392	0.7571
154.517	0.7571
154.641	0.76004
154.765	0.76787
154.889	0.77669
155.014	0.77963
155.138	0.79726
155.262	0.79628
155.387	0.80999
155.511	0.81097
155.635	0.81293
155.76	0.82958
155.884	0.82468
156.008	0.82566
156.133	0.85406
156.257	0.85406
156.381	0.86582
156.506	0.86386
156.63	0.86876
156.754	0.87365
156.879	0.87561
157.003	0.87169
157.127	0.87365
157.251	0.86974
157.376	0.85406
157.5	0.83839
157.624	0.83448
157.749	0.8286
157.873	0.86288
157.997	0.8668
158.121	0.8668
158.246	0.88737
158.37	0.90989
158.494	0.94025
158.619	0.95984
158.743	0.96572
158.867	0.97747
158.992	0.96474
159.116	0.98923
159.24	0.99804
159.365	1
159.489	0.99608
159.613	0.99021
159.738	0.98727
159.862	0.97649
159.986	0.97649
160.111	0.98531
160.235	0.98531
160.359	0.97062
160.483	0.97258
160.608	0.97258
160.732	0.9716
160.856	0.97062
160.981	0.95201
161.105	0.9667
161.229	0.96964
161.354	0.96964
161.478	0.97649
161.602	0.98923
161.726	0.97356
161.851	0.97356
161.975	0.96572
162.099	0.93928
162.224	0.92948
162.348	0.91969
162.472	0.90597
162.597	0.89128
162.721	0.88541
162.845	0.88541
162.97	0.91479
163.094	0.91185
163.218	0.90304
163.343	0.91185
163.467	0.89226
163.591	0.87561
163.715	0.87561
163.84	0.86974
163.964	0.87267
164.088	0.86876
164.213	0.89324
164.337	0.88737
164.461	0.88834
164.586	0.88247
164.71	0.85602
164.834	0.85602
164.959	0.84427
165.083	0.8237
165.207	0.80999
165.332	0.78844
165.456	0.78844
165.58	0.77277
165.704	0.74535
165.829	0.74339
165.953	0.73164
166.077	0.71988
166.202	0.71988
166.326	0.69638
166.45	0.67483
166.575	0.66601
166.699	0.63565
166.823	0.6239
166.947	0.59941
167.072	0.59549
167.196	0.59549
167.32	0.5906
167.445	0.57982
167.569	0.58668
167.693	0.57493
167.818	0.57689
167.942	0.57786
168.066	0.57591
168.191	0.57689
168.315	0.59549
168.439	0.60431
168.564	0.6141
168.688	0.6141
168.812	0.6141
168.936	0.63271
169.061	0.63271
169.185	0.62684
169.309	0.64643
169.434	0.61312
169.558	0.61312
169.682	0.60921
169.807	0.60725
169.931	0.60235
170.055	0.58178
170.18	0.57884
170.304	0.55534
170.428	0.55534
170.553	0.54163
170.677	0.53183
170.801	0.52106
170.925	0.51224
171.05	0.48776
171.174	0.47502
171.298	0.46817
171.423	0.45642
171.547	0.46033
171.671	0.43781
171.796	0.42507
171.92	0.42507
172.044	0.42214
172.168	0.42801
172.293	0.42214
172.417	0.4143
172.541	0.41332
172.666	0.40255
172.79	0.39765
172.914	0.38002
173.039	0.36533
173.163	0.34868
173.287	0.34868
173.412	0.35162
173.536	0.34378
173.66	0.33692
173.785	0.34378
173.909	0.33692
174.033	0.33888
174.157	0.33497
174.282	0.32517
174.406	0.32615
174.53	0.32517
174.655	0.32517
174.779	0.31832
174.903	0.32811
175.028	0.32223
175.152	0.31734
175.276	0.30852
175.401	0.30264
175.525	0.30656
175.649	0.3046
175.774	0.30852
175.898	0.30852
176.022	0.30754
176.146	0.31048
176.271	0.3095
176.395	0.31146
176.519	0.31342
176.644	0.3095
176.768	0.29775
176.892	0.28893
177.017	0.28893
177.141	0.2811
177.265	0.28208
177.389	0.28208
177.514	0.27718
177.638	0.27228
177.762	0.27228
177.887	0.28012
178.011	0.27424
178.135	0.28404
178.26	0.28404
178.384	0.27522
178.508	0.27914
178.633	0.27424
178.757	0.28208
178.881	0.26053
179.006	0.25759
179.13	0.25759
179.254	0.25465
179.379	0.25661
179.503	0.25465
179.627	0.24976
179.751	0.2478
179.876	0.25269
180	0.25563
180.124	0.25759
180.249	0.25857
180.373	0.25857
180.497	0.24584
180.621	0.25171
180.746	0.24682
180.87	0.25073
180.994	0.2478
181.119	0.23604
181.243	0.24094
181.367	0.24192
181.492	0.23898
181.616	0.2429
181.74	0.23702
181.865	0.24094
181.989	0.24192
182.113	0.24094
182.238	0.24094
182.362	0.23898
182.486	0.24094
182.611	0.24192
182.735	0.24584
182.859	0.24094
182.983	0.23898
183.108	0.23898
183.232	0.2331
183.356	0.23017
183.481	0.21743
183.605	0.22233
183.729	0.22233
183.854	0.22527
183.978	0.22919
184.102	0.2331
184.226	0.22919
184.351	0.23604
184.475	0.23017
184.599	0.23702
184.724	0.23213
184.848	0.23213
184.972	0.23506
185.097	0.238
185.221	0.23898
185.345	0.23898
185.47	0.24682
185.594	0.24682
185.718	0.24878
185.843	0.25073
185.967	0.26053
186.091	0.26641
186.215	0.2713
186.34	0.27816
186.464	0.27816
186.588	0.2713
186.713	0.27424
186.837	0.26053
186.961	0.26347
187.086	0.26249
187.21	0.26249
187.334	0.27032
187.459	0.27816
187.583	0.28208
187.707	0.28697
187.832	0.31146
187.956	0.29089
188.08	0.29383
188.204	0.30852
188.329	0.31342
188.453	0.33105
188.577	0.33203
188.702	0.33203
188.826	0.3379
188.95	0.33888
189.075	0.34084
189.199	0.33497
189.323	0.33497
189.447	0.32909
189.572	0.32811
189.696	0.32125
189.82	0.33399
189.945	0.33399
190.069	0.33497
190.193	0.34476
190.318	0.35455
190.442	0.35945
190.566	0.35945
190.691	0.36827
190.815	0.38198
190.939	0.39177
191.064	0.4143
191.188	0.4143
191.312	0.43095
191.436	0.43193
191.561	0.44466
191.685	0.45054
191.809	0.45935
191.934	0.46523
192.058	0.47111
192.182	0.47894
192.307	0.49363
192.431	0.49363
192.555	0.49559
192.68	0.50637
192.804	0.49363
192.928	0.51322
193.053	0.49951
193.177	0.51028
193.301	0.52693
193.425	0.53673
193.55	0.55044
193.674	0.5524
193.798	0.55338
193.923	0.54946
194.047	0.52693
194.171	0.52693
194.296	0.51812
194.42	0.52106
194.544	0.51714
194.668	0.5191
194.793	0.51812
194.917	0.51616
195.041	0.51322
195.166	0.51322
195.29	0.51322
195.414	0.50735
195.539	0.52204
195.663	0.5191
195.787	0.5191
195.912	0.53575
196.036	0.5475
196.16	0.57689
196.285	0.55828
196.409	0.57101
196.533	0.58864
196.657	0.58178
196.782	0.5857
196.906	0.5808
197.03	0.59158
197.155	0.57101
197.279	0.58668
197.403	0.58472
197.528	0.57101
197.652	0.57003
197.776	0.57003
197.901	0.57395
198.025	0.56121
198.149	0.56219
198.274	0.56513
198.398	0.57493
198.522	0.56807
198.646	0.56807
198.771	0.57003
198.895	0.56513
199.019	0.57003
199.144	0.55632
199.268	0.56024
199.392	0.55044
199.517	0.54848
199.641	0.53673
199.765	0.51126
199.889	0.51518
200.014	0.50245
200.138	0.50049
200.262	0.48776
200.387	0.49167
200.511	0.49167
200.635	0.50245
200.76	0.49265
200.884	0.50049
201.008	0.50539
201.133	0.50147
201.257	0.50343
201.381	0.50343
201.506	0.52008
201.63	0.54261
201.754	0.54261
201.879	0.54065
202.003	0.55534
202.127	0.55534
202.251	0.55828
202.376	0.55632
202.5	0.57297
202.624	0.5573
202.749	0.55926
202.873	0.55338
202.997	0.55632
203.121	0.56121
203.246	0.54946
203.37	0.54946
203.494	0.55926
203.619	0.5808
203.743	0.5808
203.867	0.57884
203.992	0.58472
204.116	0.58472
204.24	0.58178
204.365	0.58374
204.489	0.58374
204.613	0.59452
204.738	0.58668
204.862	0.58668
204.986	0.59256
205.111	0.58472
205.235	0.58472
205.359	0.5857
205.483	0.59354
205.608	0.59354
205.732	0.59354
205.856	0.60529
205.981	0.60529
206.105	0.57786
206.229	0.57884
206.354	0.57884
206.478	0.58276
206.602	0.58472
206.726	0.58472
206.851	0.58472
206.975	0.58178
207.099	0.60137
207.224	0.59745
207.348	0.57786
207.472	0.58668
207.597	0.59158
207.721	0.59256
207.845	0.61508
207.97	0.61508
208.094	0.619
208.218	0.63859
208.343	0.65132
208.467	0.67581
208.591	0.68658
208.715	0.68658
208.84	0.69442
208.964	0.6905
209.088	0.70323
209.213	0.70715
209.337	0.71205
209.461	0.71401
209.586	0.68854
209.71	0.68364
209.834	0.68071
209.959	0.68071
210.083	0.65426
210.207	0.62977
210.332	0.62977
210.456	0.60823
210.58	0.60725
210.704	0.62096
210.829	0.61019
210.953	0.62782
211.077	0.65034
211.202	0.62488
211.326	0.65328
211.45	0.6523
211.575	0.64447
211.699	0.63859
211.823	0.6141
211.947	0.59843
212.072	0.58864
212.196	0.59452
212.32	0.57395
212.445	0.56219
212.569	0.54358
212.693	0.54358
212.818	0.52008
212.942	0.50343
213.066	0.4858
213.191	0.4858
213.315	0.47894
213.439	0.45935
213.564	0.45642
213.688	0.45446
213.812	0.45054
213.936	0.44368
214.061	0.44858
214.185	0.43879
214.309	0.46719
214.434	0.48286
214.558	0.49363
214.682	0.49363
214.807	0.50343
214.931	0.51224
215.055	0.50343
215.18	0.50343
215.304	0.5191
215.428	0.52889
215.553	0.51028
215.677	0.51028
215.801	0.4858
215.925	0.47698
216.05	0.46229
216.174	0.44858
216.298	0.44368
216.423	0.44466
216.547	0.43976
216.671	0.42605
216.796	0.42605
216.92	0.40255
217.044	0.40548
217.168	0.37904
217.293	0.37316
217.417	0.36533
217.541	0.35749
217.666	0.33986
217.79	0.32909
217.914	0.33007
218.039	0.31636
218.163	0.29971
218.287	0.29285
218.412	0.28893
218.536	0.28893
218.66	0.28404
218.785	0.27228
218.909	0.2762
219.033	0.28208
219.157	0.2762
219.282	0.27914
219.406	0.27522
219.53	0.26738
219.655	0.26738
219.779	0.26934
219.903	0.27326
220.028	0.26836
220.152	0.26347
220.276	0.25465
220.401	0.25465
220.525	0.24682
220.649	0.23898
220.774	0.238
220.898	0.24094
221.022	0.22919
221.146	0.22919
221.271	0.23408
221.395	0.2331
221.519	0.238
221.644	0.23506
221.768	0.23506
221.892	0.23115
222.017	0.23017
222.141	0.23017
222.265	0.238
222.389	0.23996
222.514	0.24094
222.638	0.23604
222.762	0.23604
222.887	0.23408
223.011	0.23408
223.135	0.22919
223.26	0.22919
223.384	0.23017
223.508	0.2331
223.633	0.22625
223.757	0.22429
223.881	0.21841
224.006	0.21841
224.13	0.20862
224.254	0.20274
224.379	0.20666
224.503	0.20862
224.627	0.20666
224.751	0.20666
224.876	0.20372
225	0.20666
225.124	0.20666
225.249	0.20764
225.373	0.21254
225.497	0.20274
225.621	0.21352
225.746	0.2145
225.87	0.20568
225.994	0.20666
226.119	0.21645
226.243	0.2145
226.367	0.2145
226.492	0.22135
226.616	0.22919
226.74	0.23115
226.865	0.22233
226.989	0.21841
227.113	0.2145
227.238	0.2145
227.362	0.21841
227.486	0.2096
227.611	0.20568
227.735	0.20568
227.859	0.20372
227.983	0.1998
228.108	0.1998
228.232	0.19882
228.356	0.20372
228.481	0.20568
228.605	0.20372
228.729	0.20274
228.854	0.19882
228.978	0.20274
229.102	0.20274
229.226	0.21645
229.351	0.22821
229.475	0.23898
229.599	0.24878
229.724	0.24486
229.848	0.24486
229.972	0.24878
230.097	0.24878
230.221	0.24976
230.345	0.23702
230.47	0.24388
230.594	0.24976
230.718	0.25367
230.843	0.25171
230.967	0.25073
231.091	0.25073
231.215	0.25759
231.34	0.25563
231.464	0.25759
231.588	0.27326
231.713	0.27032
231.837	0.2762
231.961	0.27816
232.086	0.28795
232.21	0.29383
232.334	0.29873
232.459	0.29089
232.583	0.29089
232.707	0.29677
232.832	0.30558
232.956	0.30558
233.08	0.29873
233.204	0.29873
233.329	0.29971
233.453	0.29971
233.577	0.30656
233.702	0.30362
233.826	0.31636
233.95	0.31832
234.075	0.32615
234.199	0.33399
234.323	0.35064
234.447	0.35064
234.572	0.35357
234.696	0.35847
234.82	0.36435
234.945	0.3761
235.069	0.3712
235.193	0.37512
235.318	0.37806
235.442	0.38296
235.566	0.38296
235.691	0.38296
235.815	0.38198
235.939	0.38198
236.064	0.38296
236.188	0.38394
236.312	0.38394
236.436	0.39961
236.561	0.39765
236.685	0.42311
236.809	0.42997
236.934	0.43095
237.058	0.43095
237.182	0.41822
237.307	0.42311
237.431	0.4143
237.555	0.41136
237.68	0.4094
237.804	0.43095
237.928	0.43683
238.053	0.43879
238.177	0.45348
238.301	0.45739
238.425	0.45739
238.55	0.46229
238.674	0.47111
238.798	0.47992
238.923	0.4809
239.047	0.48972
239.171	0.49265
239.296	0.49167
239.42	0.49657
239.544	0.49755
239.668	0.49559
239.793	0.49951
239.917	0.49951
240.041	0.51322
240.166	0.5093
240.29	0.51224
240.414	0.53183
240.539	0.5573
240.663	0.56219
240.787	0.56219
240.912	0.56415
241.036	0.55828
241.16	0.55534
241.285	0.57101
241.409	0.57101
241.533	0.57689
241.657	0.57884
241.782	0.59158
241.906	0.59158
242.03	0.60235
242.155	0.61312
242.279	0.63859
242.403	0.64545
242.528	0.6523
242.652	0.66895
242.776	0.67385
242.901	0.67679
243.025	0.67679
243.149	0.68071
243.274	0.67875
243.398	0.69442
243.522	0.69246
243.646	0.70225
243.771	0.70813
243.895	0.71499
244.019	0.71303
244.144	0.72674
244.268	0.72968
244.392	0.74731
244.517	0.75318
244.641	0.77767
244.765	0.77767
244.889	0.77571
245.014	0.7855
245.138	0.7855
245.262	0.79922
245.387	0.78844
245.511	0.79726
245.635	0.81489
245.76	0.81391
245.884	0.80411
246.008	0.81293
246.133	0.81293
246.257	0.83937
246.381	0.85113
246.506	0.85798
246.63	0.85798
246.754	0.87561
246.879	0.88541
247.003	0.8952
247.127	0.90108
247.251	0.90206
247.376	0.91479
247.5	0.90793
247.624	0.91675
247.749	0.9334
247.873	0.93144
247.997	0.91381
248.121	0.9001
248.246	0.88639
248.37	0.88639
248.494	0.8903
[truncated: 897 more rows]

## Sheet: Sup Fig. 2
Panel c					Panel d
Min FRC					AVG FRC
0.92	Number of values	5			3.083		Number of values	5
0.94					2.4
0.91	Minimum	0.85			4.2		Mean	3.003
0.91	25% Percentile	0.88			2.83		Std. Deviation	0.7221
0.85	Median	0.91			2.5		Std. Error of Mean	0.3229
	75% Percentile	0.93
	Maximum	0.94
	Range	0.09
	10% Percentile	0.85
	90% Percentile	0.94
	Mean	0.906
	Std. Deviation	0.03362
	Std. Error of Mean	0.01503

## Sheet: Sup Fig. 3
	Panel c						Panel d
																					Resolution
Ex53 Experiment	TEMPERATURE	RI	AVG	SEM	Water RI			Decorrelation	Y1	Y2	Y3	Y4	Y5	Y6	Y7	Y8	Y9	Y10	Y11		7
Gel 1	22.1	1.331	1.33125	0.000144338	1.333		0	0.420736			0.000924	0.000888	0.001063	0.001753	0.004119	0.010791	0.028775	0.075802	0.185443		7			Resolution
	22.1	1.331					0.020408	0.617016			0.01003	0.010193	0.012215	0.020064	0.046639	0.117492	0.272121	0.480128	0.589978		7		Number of values	10
Gel 2	22.1	1.3315					0.040816	0.626795			0.02458	0.025073	0.030005	0.049	0.111563	0.262386	0.493477	0.627831	0.649881		7
	22.1	1.3315					0.061224	0.605219			0.043116	0.044024	0.052568	0.085099	0.187917	0.40211	0.61147	0.659619	0.64589		8		Minimum	7
							0.081633	0.572728			0.062914	0.06425	0.076502	0.122485	0.260507	0.502171	0.651011	0.650001	0.620082		8		25% Percentile	7
							0.102041	0.541226			0.084138	0.085917	0.101939	0.160993	0.327437	0.56673	0.657849	0.629255	0.591129		8		Median	8
							0.122449	0.513108			0.106388	0.108603	0.128317	0.199459	0.386067	0.60426	0.651342	0.6063	0.563761		8		75% Percentile	8
							0.142857	0.490122			0.132198	0.134892	0.158564	0.241787	0.442271	0.629703	0.642947	0.586446	0.541014		8		Maximum	8
							0.163265	0.472548			0.162234	0.165445	0.193319	0.288342	0.49619	0.649453	0.636375	0.571215	0.523604		8		Range	1
							0.183673	0.458588			0.196563	0.200317	0.232473	0.338264	0.546245	0.6651	0.631069	0.559083	0.509761
							0.204082	0.448284			0.236803	0.241121	0.277653	0.392997	0.59445	0.680101	0.62849	0.5506	0.499706				10% Percentile	7
							0.22449	0.442257			0.285978	0.290924	0.332048	0.455707	0.644549	0.698182	0.630598	0.546908	0.494259				90% Percentile	8
							0.244898	0.438119			0.34138	0.346926	0.392222	0.521197	0.691405	0.715618	0.633991	0.545058	0.490754
							0.265306	0.434505			0.400703	0.406772	0.45533	0.585487	0.732212	0.730378	0.636765	0.543375	0.48767				Mean	7.6
							0.285714	0.43097			0.461904	0.468353	0.518936	0.645843	0.766252	0.741997	0.638384	0.541344	0.484521				Std. Deviation	0.5164
							0.306122	0.426669			0.521677	0.52837	0.579495	0.698778	0.79205	0.749168	0.637661	0.537926	0.480365				Std. Error of Mean	0.1633
							0.326531	0.421207			0.578445	0.585196	0.635282	0.743031	0.809713	0.75165	0.634177	0.532684	0.474779
							0.346939	0.414679			0.630229	0.636853	0.684413	0.777759	0.819861	0.749846	0.628164	0.52577	0.46788				Coefficient of variation	6.795%
							0.367347	0.407183			0.676613	0.682921	0.726625	0.803576	0.823623	0.744354	0.619932	0.517363	0.459799
							0.387755	0.398904			0.716595	0.722441	0.76123	0.820878	0.821909	0.735741	0.609854	0.507732	0.450754
							0.408163	0.389745			0.748503	0.753785	0.786961	0.829536	0.814927	0.724004	0.59785	0.496777	0.440645
							0.428571	0.379962			0.77312	0.777715	0.804815	0.831132	0.803915	0.709926	0.58443	0.484865	0.429776
							0.44898	0.369918			0.791475	0.795332	0.816161	0.827421	0.790205	0.694429	0.570248	0.472494	0.418568
							0.469388	0.35963			0.803233	0.806365	0.821045	0.818955	0.774144	0.67768	0.555382	0.459702	0.407046
							0.489796	0.349384			0.809738	0.812133	0.820911	0.807221	0.756752	0.660394	0.540342	0.44688	0.395544
							0.510204	0.3392			0.81184	0.81352	0.816714	0.793031	0.738416	0.642757	0.525217	0.434074	0.38409
							0.530612	0.32924			0.810198	0.811175	0.80922	0.777183	0.71968	0.625162	0.51029	0.421502	0.372871
							0.55102	0.319494			0.805246	0.805586	0.798988	0.760096	0.700708	0.607667	0.495576	0.409162	0.36188
							0.571429	0.310142			0.79797	0.797729	0.786996	0.742568	0.682053	0.590685	0.481382	0.397296	0.351326
							0.591837	0.301084			0.7889	0.788108	0.77365	0.724728	0.663642	0.574087	0.467576	0.385781	0.341095
							0.612245	0.292405			0.77832	0.777029	0.75933	0.706917	0.645718	0.558061	0.4543	0.374732	0.331287
							0.632653	0.284106			0.766923	0.765165	0.744579	0.689401	0.628389	0.542656	0.441575	0.364156	0.321905
							0.653061	0.276208			0.755303	0.753111	0.729872	0.672419	0.611775	0.52794	0.429442	0.354082	0.312974
							0.673469	0.268685			0.743254	0.740661	0.715099	0.655921	0.595822	0.513868	0.417865	0.34448	0.304463
							0.693878	0.261505			0.731142	0.728168	0.700495	0.639961	0.580513	0.500402	0.406801	0.335311	0.29634
							0.714286	0.254679			0.719112	0.715776	0.686191	0.624617	0.565892	0.487571	0.396272	0.32659	0.288615
							0.734694	0.248167			0.707321	0.703636	0.672267	0.609863	0.551899	0.475311	0.38622	0.318268	0.281246
							0.755102	0.241977			0.695757	0.691734	0.658737	0.595722	0.538551	0.463636	0.376657	0.310354	0.274239
							0.77551	0.236067			0.684469	0.680126	0.645616	0.582143	0.525777	0.452478	0.367521	0.302796	0.267549
							0.795918	0.23045			0.673593	0.668929	0.632989	0.569175	0.513612	0.44186	0.358834	0.295611	0.261189
							0.816327	0.225081			0.663196	0.658204	0.620852	0.55675	0.501972	0.431707	0.350529	0.288744	0.255111
							0.836735	0.219961			0.653229	0.647906	0.609191	0.544867	0.490859	0.42202	0.342606	0.282193	0.249314
							0.857143	0.215099			0.643913	0.638245	0.598134	0.533582	0.480306	0.41282	0.335083	0.275974	0.243809
							0.877551	0.210436			0.635059	0.629028	0.587511	0.522749	0.47018	0.403995	0.327867	0.270008	0.238529
							0.897959	0.205999			0.626709	0.62031	0.577394	0.512436	0.460544	0.395598	0.321002	0.264332	0.233506
							0.918367	0.201737			0.618832	0.612043	0.567693	0.502529	0.451287	0.38753	0.314405	0.258878	0.22868
							0.938776	0.19768			0.611561	0.604357	0.558516	0.493115	0.442481	0.379854	0.308128	0.253688	0.224087
							0.959184	0.193791			0.60473	0.597096	0.549742	0.484096	0.434043	0.372496	0.302111	0.248713	0.219683
							0.979592	0.190073			0.598509	0.590408	0.541448	0.475501	0.425986	0.365467	0.29636	0.243957	0.215474
							1	0.188278			0.595558	0.587221	0.537457	0.471356	0.422099	0.362075	0.293585	0.241662	0.213443

## Sheet: Sup Fig. 4
Panel b
Distance_(microns)	Tub	Actin
0	0.035619	0.000224
0.74	0.033395	0.000634
1.4801	0.0375	0.00069
2.2201	0.04427	3.3e-05
2.9602	0.05418	-0.00042
3.7002	0.067044	-1.7e-05
4.4402	0.079427	-1.3e-05
5.1803	0.088134	-0.00127
5.9203	0.092575	-0.00197
6.6604	0.107666	-0.00164
7.4004	0.138369	-0.00032
8.1404	0.169181	0.001142
8.8805	0.170428	0.003264
9.6205	0.167573	0.005413
10.3605	0.187925	0.008261
11.1006	0.232366	0.012809
11.8406	0.378607	0.015195
12.5807	0.645711	0.015981
13.3207	0.886626	0.019829
14.0607	1	0.023671
14.8008	0.877978	0.032872
15.5408	0.714258	0.055137
16.2809	0.598547	0.098616
17.0209	0.46138	0.148941
17.7609	0.329237	0.186569
18.501	0.235766	0.200896
19.241	0.17881	0.267095
19.9811	0.179644	0.384161
20.7211	0.215299	0.535527
21.4611	0.287371	0.668006
22.2012	0.393359	0.656002
22.9412	0.49186	0.666699
23.6812	0.50739	0.875291
24.4213	0.447486	1
25.1613	0.398606	0.739723
25.9014	0.375314	0.475572
26.6414	0.380308	0.407016
27.3814	0.349356	0.40194
28.1215	0.299559	0.348295
28.8615	0.274184	0.29
29.6016	0.247853	0.255032
30.3416	0.21661	0.246316
31.0816	0.201472	0.192377
31.8217	0.209747	0.124976
32.5617	0.239423	0.060734
33.3018	0.28199	0.02506
34.0418	0.414223	0.025944
34.7818	0.718821	0.032387
35.5219	0.987141	0.044044
36.2619	0.980912	0.05312
37.002	0.669483	0.050905
37.742	0.286679	0.02576
38.482	0.161484	0.004248
39.2221	0.114685	-0.00186
39.9621	0.101884	-0.00289
40.7021	0.120749	-0.00263
41.4422	0.130306	-0.00209
42.1822	0.11037	0.002314
42.9223	0.082419	0.015532
43.6623	0.092233	0.028733
44.4023	0.120931	0.030364
45.1424	0.131531	0.021875
45.8824	0.115566	0.009548
46.6225	0.101525	0.001422
47.3625	0.117529	-0.00197
48.1025	0.1339	-0.0007
48.8426	0.090213	0.002756
48.8426	0	0

## Sheet: Sup. Fig. 8
Panel c
FRC min				FRY avg
2.24	Number of values	8		2.338	Number of values	8
2.24				2.321
2.24	Minimum	2.24		2.256	Minimum	2.256
2.24	25% Percentile	2.24		2.357	25% Percentile	2.325
2.24	Median	2.24		2.49	Median	2.411
2.24	75% Percentile	2.24		2.465	75% Percentile	2.608
2.24	Maximum	2.24		3.143	Maximum	3.143
2.24	Range	0		2.647	Range	0.887
	10% Percentile	2.24			10% Percentile	2.256
	90% Percentile	2.24			90% Percentile	3.143
	Mean	2.24			Mean	2.502
	Std. Deviation	0			Std. Deviation	0.2865
	Std. Error of Mean	0			Std. Error of Mean	0.1013
